# Supplementary material
Source: publisher figshare collection journal article supplement (https://sage.figshare.com/ndownloader/files/35780557)
Supplement: Supplementary file 1 [file 35780557]

Registered SWATs,Intervention,Status,PRIORITY II questions addressed
002 - Timing and mode of delivery of a self-completion questionnaire.,"Intervention 1: Be given a paper questionnaire in person at the end of a home visit. Intervention 2: Be sent a paper questionnaire in the post approximately one week after the home visit, along with a thank-you certificate for participation to-date.",Unknown,Q7 and Q18
007 - Impact of questionnaire design on response rates and satisfaction of the participants.,"Intervention 1: Questionnaire is presented with a large font size and many spaces between the questions. Intervention 2: Questionnaire is presented with a smaller font size, the questions are close together and the number of pages is reduced by 25-40%.",Inactive,Q7
013 - Financial incentives to complete follow-up questionnaires in a randomised trial.,Intervention 1: Gift voucher sent with questionnaires at both 1 and 2 years. Intervention 2: Gift voucher sent with questionnaires at 1 year. Intervention 3: Gift voucher sent with questionnaires at 2 years. Intervention 4: No gift voucher sent with either questionnaire.,Completed - published,Q4 and Q19
019 - Gifts to improve participation in research.,"Intervention 1: Predetermined prompting schedule for return of questionnaires, for example by telephone, email or post. Intervention 2: No prompting.",Completed - require data,Q4
021 - Provision of incentives to improve participant response to data collection in a randomised trial of a public health intervention,"Intervention 1: A small retail voucher upon completion of baseline, 6, 12 and 18-month data collection time points. Intervention 2: Entry into a lottery to win an electronic tablet device upon completion of baseline, 6, 12 and 18-month data collection time points.",Completed - published parent trials,Q4 and Q19
024 - Using a theoretically informed cover letter to improve response rates to annual postal questionnaires.,Intervention 1: Theoretically informed cover letter issued with annual questionnaires (year 1 and 2). Intervention 2: Standard cover letter issued with annual questionnaires (year 1 and 2).,Completed - published,Q4 and Q15
"025 - Two-by-two factorial randomised trial to evaluate strategies
to improve follow-up in a randomised prevention trial","Intervention 1: Monetary payment. A £10 voucher included with the invitation to attend the 24 month follow up versus a £10 voucher to be given after the 24 month follow up is due (regardless of whether this follow-up is completed). Intervention 2: Contact by SMS versus not, prior to sending questionnaires at 3, 6 and 12 months.",Completed - published,Q4/Q6/Q19
028 - Pre-notification of trial participants by newsletter to improve response rates,"Intervention 1: Newsletter printed as an A5 single sheet, which was sent approximately 6 weeks before participants were due to receive their 24-month questionnaire. The sheet was folded into a booklet, giving the participants an update on the trials progress, and reminding them about the importance of returning their questionnaires whether or not they were in the control or intervention group. On the back of the newsletter, there was a brief description, with a photograph, of the local study team, with a reminder of the local trial coordinator’s contact details if the participant had any queries or questions. Intervention 2: Same newsletter sent after participants had returned their follow-up questionnaire",Completed - published,Q4 and Q15
029 - Effect of envelope colour on response rates,"Intervention 1: Brown coloured mailing envelope, with a pre-paid brown reply envelope. A study questionnaire was also sent out in a brown envelope 1 week after consenting to participate in the trial. Participants were sent a reminder letter and a copy of the questionnaire if the research team had not received their completed questionnaire 14 days after the original questionnaire was sent. The questionnaire and reminder mailing were in a brown envelope. The mailing envelope and the pre-paid reply envelope were also brown. Intervention 2: White coloured envelope, with a white pre-paid reply envelope. A study questionnaire was also sent out in a white envelope 1 week after consenting to participate in the trial. Participants were sent a reminder letter and a copy of the questionnaire if the research team had not received their completed questionnaire 14 days after the original questionnaire was sent. The questionnaire and reminder mailing were in a white envelope. The mailing envelope and the pre-paid reply envelope were also white.",Completed - published,Q4
"031 -  Electronic prompts to increase response rates to postal
questionnaires","Intervention 1: An additional electronic prompt in the form of an email or SMS text to prompt participants to return their questionnaire. The email said ""Thank you for your involvement in the DOC study. We really appreciate your help with this study. We recently sent you a questionnaire along with a freepost envelope in connection with this study, which you should by now have received. Your answers are really important so we would be very grateful if you could return your completed questionnaire as soon as you can. If you have already returned the questionnaire please accept our apologies and ignore this email. Thank you again for your help with this study"". The SMS text message sent was: “DOC Study: You should by now have received a questionnaire from us to complete. Your answers are important so please help by returning it as soon as you can. Thank you” Intervention 2: No additional prompt",Completed - published,Q4 and Q6
"033 -  Effects of a newsletter and Post-it® note on postal
questionnaire response rates",Intervention 1: Newsletter plus handwritten Post-it® note. Intervention 2: Newsletter plus printed Post-it®. Intervention 3: Newsletter only. Intervention 4: Handwritten Post-it® note only. Intervention 5: Printed Post-it® only. Intervention 6: No newsletter or Post-it® note.,Completed - published,Q4
"034 - Offering study results as an incentive to increase response
rates to postal questionnaires",Intervention 1: 'Not offered the results': receive a one-page clinical questionnaire along with a request to give permission to send details of future research. All participants returning their questionnaire were informed of the trial's results. Intervention 2: 'Offered the results' received the same questionnaire but with an additional question asking whether they would like to be notified of the results of the trial.,Completed - published,Q4 and Q19
"035 - Personalised text message versus standard text message
prompts for increasing response to postal questionnaires",Intervention 1: Participants will receive a personalised text message (which includes their name) at the same time as they are expected to receive their postal follow-up questionnaire. Message will read: “XXXX Trial: [Mr Smith] you should have received a questionnaire in the post by now. Your answers are important; so please help by returning it as soon as you can. Thanks”. Intervention 2: Participants will receive a standard text message at the same time as they are expected to receive their postal follow-up questionnaire. Message will read: “XXXX Trial: You should have received a questionnaire in the post by now. Your answers are important; so please help by returning it as soon as you can. Thanks”,Completed - published,Q4 and Q6
"044 - Timing of text message prompts to increase trial participant
response to postal questionnaires",Intervention 1: Pre-notification: text messages will be sent on the day the questionnaires are posted to participants with the mailing out letter at 3 months follow-up. The message will read: 'UK FROST Trial: You will receive a questionnaire in the post in a few days. Your answers are important; so please help by returning it as soon as you can. Thanks.' Intervention 2: Post-notification: text messages will be sent four days after the questionnaires are sent with the mailing out letter at 3 months follow-up. The message will read: 'UK FROST Trial: You should have received a questionnaire in the post by now. Your answers are important; so please help by returning it as soon as you can. Thanks',Completed - published,Q4 and Q6
048 - Effects of a £10 note on trial retention,"Intervention 1: Participants will be given a £10 note, contingent on completion of the CO breath measure, as part of the 6 month face to face study appointment. This will be provided in addition to the £10 gift voucher currently provided as a gesture of thanks. Intervention 2: Participants will not receive a contingent £10 note following completion of their CO breath measure as part of the 6 month face to face study appointment, but will however continue to receive the £10 gift voucher currently provided as a gesture of thanks.",Completed - published,Q4 and Q19
051 - Promoting group identity to improve questionnaire return rate,"Intervention 1: Active promotion of a group identity or membership using trial promotional material, such as wristbands, and participant-friendly newsletters. Intervention 2: No promotional material or newsletters.",To start Feb 21,Q4 and Q8
"054 - Giving trial participants a thank you note or card after each
study visit",Intervention 1: Generic thank you card or note Intervention 2: Personalised thank you card or note Intervention 3: No thank you card or note,Ongoing,Q18
"057 -  Provision of information about a core outcome set and trial
questionnaire completion","Intervention 1: Study questionnaires only.(Participants randomised to this group will receive the short COS information paragraph before completing the open-ended questions that examine their attitudes to COS) Intervention 2: Short written explanation of the infant feeding COS, in addition to the study questionnaires. The COS information will be presented in a brief paragraph, before the questionnaires, which includes the following: - Statement that the questionnaires include measurement of an infant feeding COS - Lay-summary of what a COS is and how they can improve examination of trial outcomes - Brief description of how the infant feeding COS was developed with experts and parents of infants",Inactive,Q9
065 - Strategies to optimise retention to an online randomised controlled trial for relatives of people with severe mental illness,"Intervention 1:£10 conditional
Intervention 2:£10 unconditional
Intervention 3: £20 conditional
Intervention 4: £20 unconditional",Completed - soon to report,Q4 and Q19
"069 - Evaluation of offering an incentive before or after completion
of a 2-year follow-up postal questionnaire on the response rate in
parents of preterm babies.","Intervention 1: First letter to parents to include a promise that they will be given an incentive (£15 gift voucher redeemable at high street shops) after receipt of a completed form. The promise of incentive will also feature in the reminder letters. Intervention 2: First letter to parents will enclose the incentive (£15 gift voucher redeemable at high street shops) before receipt of completed form. The reminder letters will mention the incentive. Each set of parents will also be contacted by email and/or text messaging if those contact details have been collected. The content of correspondence will reflect the allocated group to which the infant was randomised. All parents will also be provided with an option of completing the questionnaire online or as a last resort, via telephone. Vouchers will be allocated per questionnaire completed so that a voucher will be provided for each baby in the case of multiple births. Infants in the same family will be allocated to the same group, as per the original trial randomisation.",Completed - published,Q4 and Q19
"076 - Sending pre-notification cards to trial participants before
outcome measurement to improve retention.",Intervention 1: Pre-notification card sent one month before a trial measurement point (e.g. one month before the 6-month follow-up questionnaire is sent). Intervention 2: No pre-notification card.,Completed - have data,Q4
"077 - TYPhooN (Thank You and Pre Notification) SWAT Protocol:
sending pre-notification emails to trial participants before outcome
measurement","Intervention 1: A combined thank you and pre-notification email (called: “pre-notification email”) sent around 2 weeks after a participant has completed a 3 month or a 6 month questionnaire. (Because of the wide time range during which UKSTAR responses are received, this email may be between one and 10 weeks before the next study time-point (i.e. the 6 month or 9 month follow-up questionnaire, respectively). Emails are sent to participants who have supplied an email address, irrespective of whether they completed the earlier questionnaire through an email link, mobile link, on paper or by phone. Intervention 2: No pre-notification email.",Inactive,Q6 and Q18
"079-  Effect of birthday cards with or without nudge on retention
and data completion rates in trials involving children","Intervention 1: Birthday card. Our PPI (patient and public involvement) group felt that the birthday cards should be as personal as possible but not have anything on the front that could be offensive. The front will therefore have the participant’s age and a gender neutral image linked to the trial. The message on the inside should be from someone they know, such as the treating clinician, or research nurse at their local site and the trial team. Intervention 2: Birthday card (as in intervention 1), but informed by nudge theory to encourage completion of questionnaires Intervention 3: No birthday card",Ongoing,Q18
080 - Post-it Note SWAT,Intervention 1: Personalised Post-it note. Intervention 2: No Personalised Post-it note.,Re-contacted 13/11,Q18
"082 -Sending Christmas cards to trial participants to improve
retention.",Intervention 1: Christmas card to the trial participant. Intervention 2: No Christmas card.,Ongoing,Q18
083 - Postal vs telephone follow-up,Intervention 1: Postal follow-up for completion of facit fatique questionnaire and EQ5D-5L Quality of Life Questionnaire Intervention 2: Telephone follow-up for completion of facit fatique questionnaire and EQ5D-5L Quality of Life Questionnaire,Results likely late 2021/ early 2022 ,Q7
"086 - Advance notification of trial participants before outcome data
collection to improve retention",Intervention 1: Pre-notification communication in advance of follow-up questionnaire. Participants who elect to complete follow-up questionnaires online will be sent a personalised pre-notification in an email two weeks prior to the mailing of this. Participants who elect to complete follow-up questionnaires in hard copy form and return by post will be sent a personalised pre-notification letter. Similar wording and layout will be used in the email and letter. Intervention 2: No pre-notification communication.,Ongoing,Q4 and Q6
"087 -  Do participants complete the original or the reminder postal
follow up questionnaire?","Intervention 1: ‘Original’ questionnaires will be identified by a green sticker on the front page and a red sticker will be used for ‘reminder’ questionnaires. When the questionnaires are received by the trials office, the date and questionnaire type will be logged using the Trial Central Management system",Ongoing,Q4
089 - Including a theoretically informed leaflet in a participant take-home pack of questionnaires to increase response rate,Intervention 1: Theoretically informed leaflet in the participant pack Intervention 2: Generic compliments slip in the participant pack,Completed - unpublished - KG has data,Q4
"090 - Does the time at which a participant incentive is given affect
the retention rate?",Intervention 1: A £20 gift voucher given at the end of the recruitment visit Intervention 2: A £20 gift voucher given after the return of the trial diary,Completed unpublished - data in Cochrane review,Q4 and Q19
"093 - Offer of a free yoga class to participants in the control group
on completion of the trial follow-up, to enhance retention and reduce
contamination",Intervention 1: Offer of a free one-off group yoga class after the main trial’s follow-up is complete Intervention 2: No offer of a yoga class,Ongoing,Q18 and Q19
096 -  Unconditional or conditional incentives for initial and followup postal questionnaires in a clinical trial,Intervention 1: First and subsequent mailed questionnaires include a £5 gift voucher attached to the questionnaire. Reminders mention the gift voucher that was sent. Intervention 2: First and subsequent mailed questionnaires include the promise of a £5 gift voucher for returning a completed questionnaire. Reminders mention the availability of the gift voucher.,Completed - published,Q4 and Q19
"109 - The effectiveness of a text message reminder which
participants can respond to, compared with a ‘no reply’ text message on
questionnaire response rates",Intervention 1: “Two way” text messages sent at the same time as host trial participants are expected to receive their postal follow-up questionnaire. The text message will encourage them to text back if they have any queries. Intervention 2: “One way” text message sent at the same time as host trial participants are expected to receive their postal follow-up questionnaire. Participants will not be able to reply to this message.,Ongoing,Q4 and Q6
"110 - Printing the primary outcomE on Pink PapER versus
standard paper to increase participant engagement to postal
questionnaires (PEPPER)",Intervention 1: Primary Outcome PROM printed on pink paper in the 6-month follow-up questionnaire Intervention 2: Primary Outcome PROM printed on white paper in the 6-month follow-up questionnaire,Ongoing - end 2021,Q4 and Q7
"119 -  Effects on retention of giving trial participants a thank you
card following each study visit.",Intervention 1: A Thank You card is sent to trial participants at 4.5 and 9 months after randomisation. The host trial includes routine weekly clinical follow up assessments (if the participant’s wound is yet to heal) and participants in this SWAT group will also be sent questionnaires for the next outcome assessment time point (at months 6 and 12) when due. Intervention 2: Standard practice for the host trial (i.e.no thank you card). The host trial includes routine weekly clinical follow up assessments (if the participant’s wound is yet to heal) and participants in this SWAT group will receive no further contact until the next outcome assessment time point (at months 6 and 12).,Ongoing,Q18
"121 - What are the effects on retention and follow-up of courtesy
telephone calls versus postcards to trial participants following
enrolment?","Intervention 1: A courtesy introductory telephone call [within two weeks] of being randomised into ARTISAN. This telephone call will include the following content: a) thanks for taking part in the ARTISAN trial; b) reminder about how valuable their contribution is; c) reminder that they will be contacted by post at six weeks, and then at 3, 6 and 12 months post randomisation, and that these contacts are just as important as their first visit; d) information about when the trial results are expected; e) reminder that they can contact the ARTISAN team if they have any queries. Intervention 2: A postcard-sized written card, with similar content as above, signed by the Chief Investigator and Trial Manager posted in an envelope to participants’ homes within one week of being randomised.",Ongoing,Q7 and Q18
